# Supplementary material for: Automated, phylogeny-based genotype delimitation of the Hepatitis Viruses HBV and HCV
Source: PeerJ. 2019 Oct 25;7:e7754. doi: 10.7717/peerj.7754 (PMC6816385; doi:10.7717/peerj.7754)
Supplement: Appendix S1 — In the first column is provided the NCBI Accession Numbers and the code name of each sequence. In the following columns is the correspondance of each sequence to (1) the Maximum likelihood mPTP clusters (2) the ABGD clusters under the parameters that yielded the closest result to current taxonomy (see main text and Fig. 3), (3) the currently aknowledged genotypes and (4) subgenotypes (HBV) or subtypes (HCV). [file peerj-07-7754-s005.xlsx]

## Sheet: HBV
Sequence code	mPTP cluster	ABGD cluster	original classification_genotype	original classification_subgenotype	Classification applicable only for genotype F
G_AF160501	1	7	G	Not applicable for this genotype
G_AB064310	1	7	G	Not applicable for this genotype
G_AB064312	1	7	G	Not applicable for this genotype
G_AB056513	1	7	G	Not applicable for this genotype
D4_AB048702	2	4	D	4
D4_AB048701	2	4	D	4
D4_AB033559	2	4	D	4
D7_FJ904447	2	4	D	7
D1_FJ904413	2	4	D	1
D3_EU594435	2	4	D	3
D3_AJ132335	2	4	D	3
D3_AY902776	2	4	D	3
D3_DQ336688	2	4	D	3
D6_AB493845	2	4	D	6
D6_AB493846	2	4	D	6
D2_AY090452	2	4	D	2
D2_Z35716	2	4	D	2
D2_AB119256	2	4	D	2
D1_X59795	2	4	D	1
D1_AY161157	2	4	D	1
D1_AF151735	2	4	D	1
D5_GQ205379	2	4	D	5
D5_DQ315779	2	4	D	5
E_X75664	3	5	E	Not applicable for this genotype
E_X75657	3	5	E	Not applicable for this genotype
B1_AB073858	4	2	B	1
B1_AB073838	4	2	B	1
B1_D00329	4	2	B	1
B2_AY596111	4	2	B	2
B2_AF282917	4	2	B	2
B2_X97850	4	2	B	2
B4_AB031266	4	2	B	4
B4_AB073835	4	2	B	4
B4_AY033073	4	2	B	4
B5_AB241117	4	2	B	5
B5_AB219429	4	2	B	5
B8_AP011093	4	2	B	8
B8_AP011095	4	2	B	8
B7_AP011088	4	2	B	7
B7_AP011089	4	2	B	7
B3_AB219430	4	2	B	3
B3_AB033555	4	2	B	3
B6_AB287320	4	2	B	6
B6_AB287321	4	2	B	6
B6_AB287325	4	2	B	6
B6_DQ463792	4	2	B	6
B6_DQ463790	4	2	B	6
B6_AB287318	4	2	B	6
B6_DQ463789	4	2	B	6
B6_AB287314	4	2	B	6
B6_AB287316	4	2	B	6
A6_GQ331046	5	1	A	6
A6_GQ331047	5	1	A	6
A1_AY233277	5	1	A	1
A1_AB076679	5	1	A	1
A1_M57663	5	1	A	1
A4_AY934764	5	1	A	4
A4_GQ161813	5	1	A	4
A5_24165	5	1	A	5
A5_24063	5	1	A	5
A5_FJ692611	5	1	A	5
A5_FJ692595	5	1	A	5
A5_FJ692598	5	1	A	5
A2_AJ344115	5	1	A	2
A2_AF090838	5	1	A	2
A2_AF297622	5	1	A	2
C4_AB048705	6	3	C	4
C4_AB048704	6	3	C	4
C3_X75665	7	3	C	3
C3_X75656	7	3	C	3
C5_AF241411	7	3	C	5
C5_AB241109	7	3	C	5
C5_AB241110	7	3	C	5
C1_AB112472	7	3	C	1
C1_AB111946	7	3	C	1
C1_AB074756	7	3	C	1
C2_AY206379	7	3	C	2
C2_AB115417	7	3	C	2
C2_M38636	7	3	C	2
C8_AP011104	7	3	C	8
C8_AP011106	7	3	C	8
C3_AB493841	7	3	C	3
C6_AP011103	7	3	C	6
C3_AB493842	7	3	C	3
C3_AB493840	7	3	C	3
C6_AP011102	7	3	C	6
C3_AB493839	7	3	C	3
H_AY090454	8	8	H	Not applicable for this genotype
H_AY090457	8	8	H	Not applicable for this genotype
H_AY090460	8	8	H	Not applicable for this genotype
H_AB275308	8	8	H	Not applicable for this genotype
H_AB059660	8	8	H	Not applicable for this genotype
F3_X75663	9	9	F	3
F3_AB116550	9	9	F	3
F3_AB116549	9	9	F	3
F4_AB166850	9	9	F	4
F4_AB214516	9	9	F	4
F4_AF223965	9	9	F	4
F4_AF223962	9	9	F	4
F2a_AY090455	9	9	F	2	a
F2a_AY311369	9	9	F	2	a
F2b_DQ899146	9	9	F	2	b
F2b_DQ899144	9	9	F	2	b
F1a_AY090459	9	6	F	1	a
F1a_AY090458	9	6	F	1	a
F1a_AY090456	9	6	F	1	b
F1b_AB116654	9	6	F	1	b
F1b_AB086397	9	6	F	1	b
F1b_FJ657525	9	6	F	1	b
F1b_AF223963	9	6	F	1	b

## Sheet: HCV
Sequence code	mPTP cluster	ABGD cluster	original classification_genotype	original classification_subtype
3g_JX227954	1	3	3	g
3g_JF735123	1	3	3	g
3b_D49374	1	3	3	b
3b_JQ065709	1	3	3	b
3i_FJ407092	1	3	3	i
3i_JX227955	1	3	3	i
3a_D17763	1	3	3	a
3a_X76918	1	3	3	a
3a_D28917	1	3	3	a
3a_JN714194	1	3	3	a
3e_KJ470618	1	3	3	e
3d_KJ470619	1	3	3	d
3k_D63821	2	5	3	k
3k_JF735122	2	5	3	k
3h_JF735126	3	4	3	h
3h_JF735121	3	4	3	h
3_JF735124	3	6	3
5_KT595242	4	8	5
5a_AF064490	4	8	5	a
5a_Y13184	4	8	5	a
4m_FJ462433	5	7	4	m
4m_JX227972	5	7	4	m
4d_FJ462437	5	7	4	d
4d_EU392172	5	7	4	d
4d_DQ418786	5	7	4	d
4c_FJ462436	5	7	4	c
4a_DQ418789	5	7	4	a
4a_Y11604	5	7	4	a
4a_DQ988074	5	7	4	a
4_JF735135	5	7	4
4f_EU392175	5	7	4	f
4f_EU392174	5	7	4	f
4f_EF589161	5	7	4	f
4p_FJ462431	5	7	4	p
4t_FJ839869	5	7	4	t
4o_JX227977	5	7	4	o
4o_FJ462440	5	7	4	o
4_JF735129	5	7	4
4v_JX227959	5	7	4	v
4v_JX227960	5	7	4	v
4v_HQ537008	5	7	4	v
4v_HQ537009	5	7	4	v
4q_FJ462434	5	7	4	q
4_JF735131	5	7	4
4_JF735130	5	7	4
4l_JX227957	5	7	4	l
4l_FJ839870	5	7	4	l
4_JF735132	5	7	4
4s_JF735136	5	7	4	s
4n_JX227970	5	7	4	n
4n_FJ462441	5	7	4	n
4b_FJ462435	5	7	4	b
4_JF735127	5	7	4
4_JF735134	5	7	4
4_JF735138	5	7	4
4_FJ025854	5	7	4
4w_FJ025855	5	7	4	w
4w_FJ025856	5	7	4	w
4_JX227964	5	7	4
4g?_JX227963	5	7	4	g?
4g_JX227971	5	7	4	g
4g_FJ462432	5	7	4	g
4k_EU392173	5	7	4	k
4k_FJ462438	5	7	4	k
4k_EU392171	5	7	4	k
4r_JX227976	5	7	4	r
4r_FJ462439	5	7	4	r
1j_KJ439773	6	1	1	j
1k_KJ439774	6	1	1	k
1_KJ439777	6	1	1
1a_HQ850279	6	1	1	a
1a_EF407457	6	1	1	a
1a_AF009606	6	1	1	a
1a_M67463	6	1	1	a
1a_M62321	6	1	1	a
1n_KJ439781	6	1	1	n
1n_KJ439775	6	1	1	n
1m_KJ439782	6	1	1	m
1m_KJ439778	6	1	1	m
1_KJ439780	6	1	1
1c_AY651061	6	1	1	c
1c_D14853	6	1	1	c
1c_AY051292	6	1	1	c
1_KJ439779	6	1	1
1b_EU781828	6	1	1	b
1b_EU781827	6	1	1	b
1b_D90208	6	1	1	b
1b_M58335	6	1	1	b
1i_KJ439772	6	1	1	i
1d_KJ439768	6	1	1	d
1_AJ851228	6	1	1
1h_KC248198	6	1	1	h
1h_KC248199	6	1	1	h
1g_AM910652	6	1	1	g
1e_KC248194	6	1	1	e
1_KC248195	6	1	1
1l_KC248196	6	1	1	l
1l_KC248193	6	1	1	l
1l_KC248197	6	1	1	l
1_KJ439776	6	1	1
1_HQ537007	6	1	1
6a_Y12083	7	9	6	a
6a_AY859526	7	9	6	a
6a_HQ639936	7	9	6	a
6a_EU246930	7	9	6	a
6xd_KM252790	8	9	6	xd
6xd_KM252789	8	9	6	xd
6xd_KM252791	8	9	6	xd
6b_D84262	8	9	6	b
6_KC844040	9	17	6
6xf_KJ567646	10	30	6	xf
6xf_KJ567647	10	30	6	xf
6_KJ567648	10	32	6
6t_EU246939	10	27	6	t
6t_EF632071	10	27	6	t
6p_EF424626	10	24	6	p
6o_EU246934	10	23	6	o
6o_EF424627	10	23	6	o
6u_EU246940	10	28	6	u
6e_DQ314805	10	21	6	e
6e_EU246932	10	21	6	e
6e_EU246931	10	21	6	e
6xc_KJ567651	10	29	6	xc
6_KJ567649	10	29	6
6_KJ567650	10	29	6
6_KJ567652	10	31	6
6q_EF424625	10	25	6	q
6c_EF424629	10	10	6	c
6d_D84263	10	20	6	d
6r_EU408328	10	26	6	r
6f_EU246936	10	22	6	f
6f_DQ835760	10	22	6	f
6s_EU408329	10	13	6	s
6w_DQ278892	10	15	6	w
6w_EU643834	10	15	6	w
6w_EU643836	10	15	6	w
6_KJ470625	10	11	6
6_KJ470623	10	11	6
6_KJ470624	10	11	6
6_KJ470620	10	11	6
6_KJ470622	10	11	6
6_KJ470621	10	11	6
6g_DQ314806	10	11	6	g
6g_D63822	10	11	6	g
6h_D84265	11	12	6	h
6j_DQ835769	11	12	6	j
6j_DQ835761	11	12	6	j
6_JX183558	11	12	6
6i_DQ835770	11	12	6	i
6i_DQ835762	11	12	6	i
6xe_JX183557	11	12	6	xe
6xe_KM252792	11	12	6	xe
6n_DQ835768	11	12	6	n
6n_EU246938	11	12	6	n
6n_DQ278894	11	12	6	n
6m_DQ835767	11	12	6	m
6m_DQ835766	11	12	6	m
6k_D84264	11	12	6	k
6_JX183549	11	12	6
6_DQ278891	11	12	6
6_DQ278893	11	12	6
6_JX183550	11	12	6
6_JX183551	11	12	6
6_KJ567644	11	12	6
6xb_KJ567645	11	12	6	xb
6xb_JX183552	11	12	6	xb
6_JX183553	11	12	6
6_JX183554	11	12	6
6l_JX183556	11	12	6	l
6l_EF424628	11	12	6	l
6xa_EU408330	12	16	6	xa
6xa_EU408331	12	16	6	xa
6xa_EU408332	12	16	6	xa
6_KC844039	13	33	6
6v_EU158186	14	14	6	v
6v_EU798761	14	14	6	v
6v_EU798760	14	14	6	v
2_KC197237	15	2	2
2_KC197236	15	2	2
2j_HM777359	15	2	2	j
2j_JF735113	15	2	2	j
2j_HM777358	15	2	2	j
2e_JF735120	15	2	2	e
2_JF735117	15	2	2
2d_JF735114	15	2	2	d
2f_KC844042	15	2	2	f
2f_KC844050	15	2	2	f
2i_DQ155561	15	2	2	i
2c_D50409	15	2	2	c
2c_JX227949	15	2	2	c
2r_JF735115	15	2	2	r
2k_JX227953	15	2	2	k
2k_AB031663	15	2	2	k
2q_FN666429	15	2	2	q
2q_FN666428	15	2	2	q
2_JF735118	15	2	2
2m_JX227967	15	2	2	m
2m_JF735111	15	2	2	m
2u_JF735112	15	2	2	u
2_JF735119	15	2	2
2_JF735116	15	2	2
2a_D00944	15	2	2	a
2a_AB047639	15	2	2	a
2a_HQ639944	15	2	2	a
2_KC197239	15	2	2
2_JF735110	15	2	2
2t_KC197238	15	2	2	t
2b_AB661382	15	2	2	b
2b_AB030907	15	2	2	b
2b_D10988	15	2	2	b
2b_AB661388	15	2	2	b
7a_EF108306	16	18	7	a
7b_KX092342	16	19	7	b
